# Supplementary material for: Malassezia pachydermatis from brown bear: A comprehensive analysis reveals novel genotypes and distribution of all detected variants in domestic and wild animals
Source: Front Microbiol. 2023 Apr 12;14:1151107. doi: 10.3389/fmicb.2023.1151107 (PMC10236562; doi:10.3389/fmicb.2023.1151107)
Supplement: Supplementary file 1 [file Table_1.XLSX]

## Sheet: Table S1
TABLE S1. Sampling data
Bear number	Sample#	Number	Br. smrznutog uzorka	Date	ID #	Sample number	Date of sampling	Location	X coordinate	Y coordinate	Sampling site	Genotype
1	1	2	medo Malassezia		RH 155/13	1	2013-06-14	Podmali Zlobin, Hreljin VIII/126	5473703	5015500	n.d.**	B4
2	2	3	M-350/13	2013-11-22	Medvjed - Kuterevo-KB10	2	2013-11-22	Kuterevo - shelter	5511468	4964585	anus	B4
3	3	5	M-326/14	16.5.2014.	Medvjed RH 155/14	3	16.5.2014.	NP Plitvička jezera	5555602	4971178	anus	B1
	4	6	M-326/14	16.5.2014.	RH 155/14	4					left ear	B1
	5	7	M-326/14	16.5.2014.	RH 155/14	5					right ear	B1
4	6	9	M-30/13	30.1.2013.	RH-209/12	6	30.1.2013.	Dno, Smrekova draga VIII/21	5455499	5035835	left and right ear	B1
5	7	4	M-329/14	16.5.2014.	Medvjed RH 156/14	7	16.5.2014.	Tunel Sleme, Bjelolasica VIII/2	5480871	5021629	anus	B1
	8	11	M-329/14	16.5.2014.	RH 156/14	8					right ear	B1
6	9	12	M-28/09	2009-04-17	0004	9	2009-04-17	Krasnica, Mala Kapela I IV/7	5528489	4987625	left and right ear	B1
	10	17	M-28/09	2009-04-17	0004	10					anus	B1
7	11	13	MEDVJEDIĆ 3	12.05.2010.	lovište Kupa 18	11	12.05.2010.	Kuželj - Gašparci, Kupa-18	5483893	5039505	n.d.**	B1
8	12	19	M-46/11	31.11.2011.	D 143	12	31.11.2011.	Macola, Korenica IX/120	5557901	4954773	left ear	B1
9	13	23	M-27/09	2009-04-08	0046	13	2009-04-08	Prapotna draga, Smrekova draga VIII/21	5462633	5049605	left and right ear	B1
10	14	31	M-522/14	17.10.2014.	RH192/14	14	17.10.2014.	Bruvno 300 m, Veliki Urljaj XIII/132	5571694	4918883	right ear	B1
	15	32	M-522/14	2014-10-17	RH192/14	15					left ear	B1
	16	33	M-522/14	2014-10-17	RH192/14	16					anus	B1
11	17	35	M-69/15	13.3.2015.	RH153/15	17	13.3.2015.	Šapjane, DC8, Permani VIII/120	5442521	5037580	right ear	B1
12	18	36	M-86/15	24.3.2015.	RH62/15	18	24.3.2015.	Zeleno Bilo, Ričičko Bilo+I61 VIII/29	5498262	4993145	left ear	B1
	19	37	M-86/15	24.3.2015.	RH62/15	19					right ear	B1
	20	38	M-86/15	24.3.2015.	RH62/15	20					anus	B1
13	21	39	M-89/15	27.3.2015.	RH48/15	21	27.3.2015.	Prapotna draga, Smrekova draga VIII/21	5462633	5049605	left ear	B1
						22					right ear	B1
						23					anus	B1
14*	24	42	M-90/15	27.3.2015.	RH151/15	24	27.3.2015.	Bribir, Vinodol VIII/123	5480132	5003296	left ear	B2
	25	43	M-90/15	27.3.2015.	RH151/15	25					right ear	B1
	26	44	M-90/15	27.3.2015.	RH151/15	26					anus	B1
15*	27	45	M-91/15	27.3.2015.	RH42/15	27	27.3.2015.	Žage, Kupjački Vrh VIII/10	5487923	5029903	left ear	B1
	28	46	M-91/15	27.3.2015.	RH42/15	28					right ear	B1
	29	47	M-91/15	27.3.2015.	RH42/15	29					anus	B4
16	30	48	M-92/15	27.3.2015.	RH75/15	30	27.3.2015.	Vlaška voda, Petehovac VIII/115	5489250	5024500	left ear	B1
	31	49	M-92/15	27.3.2015.	RH75/15	31					right ear	B1
17	32	50	M-93/15	30.3.2015.	RH21/15	32	30.3.2015.	Blatnik, Bjelolasica VIII/2	5501239	5022106	right ear	B1
18	33	51	M-99/15	2.4.2015.	RH22/15	33	2.4.2015.	Carevica, Bjelolasica VIII/2	5493679	5012675	right ear	B1
	34	52	M-99/15	2.4.2015.	RH22/15	34					anus	B1
19	35	53	M-100/15	2.4.2015.	RH24/15	35	2.4.2015.	Slavica, Bjelolasica VIII/2	5482927	5019683	left ear	B1
	36	54	M-100/15	2.4.2015.	RH24/15	36					right ear	B1
	37	55	M-100/15	2.4.2015.	RH24/15	37					anus	B1
20	38	56	M-101/15	2.4.2015.	RH23/15	38	2.4.2015.	Drage, Bjelolasica VIII/2	5482367	5011808	left ear	B1
	39	57	M-101/15	2.4.2015.	RH23/15	39					right ear	B1
	40	58	M-101/15	2.4.2015.	RH23/15	40					anus	B1
21	41	59	M-102/15	2.4.2015.	RH50/15	41	2.4.2015.	Dno, Smrekova draga VIII/21	5455499	5035835	left ear	B1
	42	60	M-102/15	2.4.2015.	RH50/15	42					right ear	B1
	43	61	M-102/15	2.4.2015.	RH50/15	43					anus	B1
22	44	62	M-103/15	2.4.2015.	RH51/15	44	2.4.2015.	Gržin laz, Smrekova draga VIII/21	5458035	5039774	anus	B1
23	45	63	M-106/15	24.4.2015.	RH43/15	45	24.4.2015.	Rogi, Kupjački Vrh VIII/10	5490847	5029812	left ear	B1
	46	64	M-106/15	24.4.2015.	RH43/15	46					right ear	B1
24	47	65	M-108/15	10.4.2015.	RH16/15	47	10.4.2015.	Jurjeva draga, Krivi Javor I IV/23	5536718	4977697	anus	B1
25	48	66	M-123/15	20.4.2015.	RH101/15	48	20.4.2015.	Begovača, Sjeverni Velebit IX/14	5505296	4956406	left ear	B1
26	49	67	M-127/15	23.4.2015.	RH69/15	49	23.4.2015.	Mlađe br. 5, Kupički Vrh VIII/111	5473500	5038500	anus	B1
27	50	68	M-144/15	14.5.2015.	RH71/15	50	14.5.2015.	Za kosom, Vranjak VIII/112	5476701	5013546	anus	B1
28	51	69	M-149/15	20.5.2015.	B43 SLAVKO	51	20.5.2015.	Tisova kosa, Bjelolasica VIII/2	5498328	5023274	right ear	B1
	52	70	M-149/15	20.5.2015.	B43 SLAVKO	52					anus	B1
29	53	71	M-163/15	1.6.2015.	B45	53	1.6.2015.	Kozarac, Bjelolasica VIII/2	5503747	5024084	anus	B1
30	54	72	M-213/15	3.8.2015.	HRELJIN	54	3.8.2015.	Hreljin-Hreljin - 28	5470817	5015298	right ear	B1
31	55	73	M-261/15	14.9.2015.	RH 178/15	55	14.9.2015.	Pruga, Tičevo-Gomirje, Dobra VIII/28	5512473	5021339	right ear	B1
	56	74	M-261/15	14.9.2015.	RH 178/15	56					anus	B1
32	57	75	M-271/15	2015-09-21	103	57	2015-09-21	Abez, Sjeverni Velebit IX/14	5505390	4966223	left ear	B1
	58	76	M-271/15	21.9.2015.	103	58					right ear	B1
33	59	77	M-276/15	23.9.2015.	RH159/15	59	23.9.2015.	Golubinjak-Sopač, 45km+800m, ARZ	5481673	5024050	left ear	B1
	60	78	M-276/15	23.9.2015.	RH159/15	60					right ear	B1
	61	79	M-276/15	23.9.2015.	RH159/15	61					anus	B1
34	62	80	M-277/15	23.9.2015.	RH169/15	62	23.9.2015.	Rogozno	5475300	5022500	right ear	B1
	63	81	M-277/15	23.9.2015.	RH169/15	63					anus	B1
35	64	82	M-291/15	29.9.2015.	RH 36/15	64	29.9.2015.	Loknarov štand br.9, Cetin- Gložac VIII/3	5511204	5024126	anus	B1
36	65	83	M-302/15	5.10.2015.	N. LAZI	65	5.10.2015.	Novi Lazi - Naselje, Rudač II-VIII/117	5497876	5033297	left ear	B1
	66	84	M-302/15	5.10.2015.	N. LAZI	66					right ear	B1
	67	85	M-302/15	5.10.2015.	N. LAZI	67					anus	B1
37	68	86	M-303/15	5.10.2015.	RH04/15	68	5.10.2015.	Veliki Vrh, Bukovača IV/3	5517346	5024732	right ear	B3
38	69	87	M-305/15	2015-10-05	HRELJIN VLAK1	69	2015-10-05	Plase, 4km Hreljinu - Hreljin VIII/126	5470373	5015657	right ear	B1
	70	88	M-305/15	2015-10-05	HRELJIN VLAK1	70					anus	B1
39	71	89	M-306/15	2015-10-05	HRELJIN VLAK2	71	2015-10-05	Plase, 4km Hreljinu - Hreljin VIII/126	5470373	5015657	left ear	B1
	72	90	M-306/15	2015-10-05	HRELJIN VLAK2	72					right ear	B1
	73	91	M-306/15	2015-10-05	HRELJIN VLAK2	73					anus	B1
40	74	92	M-319/15	16.10.2015.	RH170/15	74	16.10.2015.	Tunac Jarak (C19, 500m), Risnjak VIII/19	5477750	5030500	left ear	B1
	75	93	M-319/15	16.10.2015.	RH170/15	75					right ear	B1
	76	94	M-319/15	16.10.2015.	RH170/15	76					anus	B1
41	77	95	M-321/15	2015-10-17	RH188/15	77	2015-10-17	Čvor Oštrovica, Autocesta Rijeka-Zagreb	5468773	5020781	left ear	B1
	78	96	M-321/15	2015-10-17	RH188/15	78					right ear	B1
	79	97	M-321/15	2015-10-17	RH188/15	79					anus	B1
42	80	98	M-322/15	2015-10-18	RH104/18	80	2015-10-18	Abez, Sjeverni Velebit IX/14	5505390	4966223	left ear	B1
*two genotypes in one bear
**n.d. - sampling site not defined
