# Supplementary material for: Malassezia pachydermatis from brown bear: A comprehensive analysis reveals novel genotypes and distribution of all detected variants in domestic and wild animals
Source: Front Microbiol. 2023 Apr 12;14:1151107. doi: 10.3389/fmicb.2023.1151107 (PMC10236562; doi:10.3389/fmicb.2023.1151107)
Supplement: Supplementary file 2 [file Table_2.XLSX]

## Sheet: Sheet1
TABLE S2. PCR primers
Genomic region	Forward primer / 5'-3' sequence	Reverse primer / 5'-3' sequence	Corresponding references
LSU	F63 / GCATATCAATAAGCGGAGGAAAAG	LR3 / GGTCCGTGTTTCAAGACG	doi:10.1099/00207713-50-3-1351
ITS1	18SF1 / AGGTTTCCGTAGGTGAACCT	58SR1 / TTCGCTGCGTTCTTCATCGA	doi:10.1099/0022-1317-49-1-29
CHS2	CED1 / CTATTCACTCGAACCATGCATGGTGTC	CED2 / GAGAAGCGCGTGCCACATGGTGCC	doi:10.1016/j.mcp.2007.01.002
β-tubulin	F-btub1 / CARGCYGGTCARTGYGGTAACCA	Fbtub4r / GCCTCAGTRAAYTCCATYTCRTCCAT	doi: 10.1016/j.vetmic.2010.09.021 and doi.org/10.1078/1439-6092-00069
