# Supplementary material for: Malassezia pachydermatis from brown bear: A comprehensive analysis reveals novel genotypes and distribution of all detected variants in domestic and wild animals
Source: Front Microbiol. 2023 Apr 12;14:1151107. doi: 10.3389/fmicb.2023.1151107 (PMC10236562; doi:10.3389/fmicb.2023.1151107)
Supplement: Supplementary file 3 [file Table_3.XLSX]

## Sheet: Sheet1
Table S3. MALDI Biotyper 3.0 performance
Isolates exhibiting wide range scores from 1.422-2.249		Isolates exhibiting scores ≥ 2
Sample number	Score range	Sample number	Score range
1*	1.556-1.956	10	2.075-2.237
2	1.693-2.008	22	2.125-2.211
3	1.657-2.142	23	2.010-2.079
4	1.642-2.144	24	2.025-2.102
5	1.634-2.199	26	2.108-2.275
6	1.747-2.099	28	2.084-2.233
7	1.729-2.053	31	2.060-2.084
8	1.744-2.016	32	2.147-2.308
9	1.925-2.149	33	2.156-2.195
11	1.670-2.023	34	2.202-2.290
12	1.761-2.139	35	2.195-2.212
13	1.650-2.124	36	2.017-2.222
14	1.756-2.005	37	2.215-2.309
15	1.667-2.201	38	2.127-2.260
16	1.735-2.113	39	2.090-2.146
17	1.741-2.029	40	2.007-2.214
18	1.812-2.119	41	2.134-2.199
19	1.726-2.172	43	2.149-2.213
20	1.722-2.184	51	2.036-2.165
21	1.674-2.191	52	2.057-2.161
25	1.870-2.015	54	2.113-2.120
27	1.973-2.180	55	2.177-2.210
29	1.742-2.056	56	2.168-2.294
30	1.422-2.249	58	2.139-2.165
42	1.773-2.104	59	2.040-2.370
44	1.999-2.126	60	2.073-2.148
45	1.533-2.077	61	2.246-2.350
46	1.743-2.127	62	2.039-2.200
47	1.726-2.244	63	2.130-2.270
48	1.458-2.089	64	2.113-2.223
49	1.786-2.135	65	2.200-2.371
50	1.573-2.073	66	2.068-2.116
53	1.844-2.128	67	2.036-2.373
57	1.991-2.131	68	2.029-2.159
		69	2.259-2.260
		70	2.056-2.196
		71	2.030-2.251
		72	2.081-2.163
		73	2.013-2.213
		74	2.186-2.210
		75	2.068-2.412
		76	2.115-2.292
		77	2.167-2.361
		78	2.142-2.286
		79	2.126-2.189
		80	2.140-2.166
*never reached score ≥ 2 (species identification score)
